# Supplementary material for: Posttraumatic Stress Symptoms Among COVID-19 Survivors After Hospitalization
Source: Atypon-hosted journal article supplement (doi:10.1176/appi.neuropsych.20220126), 2023-01-30
Supplement: appi.neuropsych.20220126.ds001.pdf [file appi.neuropsych.20220126.ds001.pdf]

**Table S1** Basic demographics and hospitalization data in Total Hospitalized, Total Survived, Total Surveyed Patients

| Characteristics/outcomes*             | Total Hospitalized<br>(N=411) |    | Total Survived<br>Hospitalization<br>(N=331) |    | Total Surveyed<br>(N=83) |    |
|---------------------------------------|-------------------------------|----|----------------------------------------------|----|--------------------------|----|
|                                       | Mean                          | SD | Mean                                         | SD | Mean                     | SD |
| Age, mean +/- SD                      | 68                            | 16 | 66                                           | 16 | 62                       | 15 |
|                                       | N                             | %  | N                                            | %  | N                        | %  |
| Female                                | 192                           | 47 | 163                                          | 49 | 39                       | 47 |
| Race                                  |                               |    |                                              |    |                          |    |
| Black                                 | 74                            | 18 | 64                                           | 19 | 20                       | 24 |
| White                                 | 289                           | 70 | 229                                          | 69 | 54                       | 65 |
| Asian                                 | 2                             | 0  | 1                                            | 0  | 1                        | 1  |
| Unknown                               | 23                            | 6  | 21                                           | 6  | 2                        | 3  |
| Other                                 | 23                            | 6  | 16                                           | 5  | 6                        | 7  |
| Ethnicity                             |                               |    |                                              |    |                          |    |
| Hispanic                              | 290                           | 71 | 229                                          | 69 | 52                       | 63 |
| Non-Hispanic                          | 111                           | 27 | 94                                           | 28 | 30                       | 36 |
| Unknown                               | 10                            | 2  | 8                                            | 2  | 1                        | 1  |
| Pre-hospital neurological conditions  | 108                           | 26 | 83                                           | 25 | 9                        | 11 |
| - Stroke/TIA                          | 30                            | 7  | 25                                           | 8  | 1                        | 1  |
| - Headaches                           | 7                             | 2  | 6                                            | 2  | 5                        | 6  |
| - Parkinson's                         | 2                             | 0  | 1                                            | 0  | 1                        | 1  |
| - Other                               | 80                            | 19 | 58                                           | 18 | 2                        | 2  |
| Pre-hospital psychological conditions | 78                            | 19 | 71                                           | 21 | 17                       | 20 |
| Depression                            | 37                            | 9  | 36                                           | 11 | 8                        | 10 |
| Anxiety                               | 39                            | 9  | 35                                           | 11 | 6                        | 7  |
| Bipolar                               | 9                             | 2  | 8                                            | 2  | 1                        | 1  |
| Renal replacement therapy             | 48                            | 12 | 27                                           | 8  | 4                        | 5  |
| Vasopressors use                      | 97                            | 24 | 42                                           | 13 | 13                       | 16 |
| ICU admission                         | 122                           | 30 | 66                                           | 20 | 21                       | 25 |
| Mechanical ventilation                | 85                            | 21 | 38                                           | 11 | 11                       | 13 |
| High-flow nasal canula                | 160                           | 39 | 99                                           | 30 | 30                       | 36 |
| Nasal canula                          | 320                           | 78 | 265                                          | 80 | 65                       | 78 |
| GOS on Discharge                      |                               |    |                                              |    |                          |    |
| Good Recovery                         | 152                           | 37 | 152                                          | 46 | 53                       | 64 |
| Moderate Disability                   | 77                            | 19 | 77                                           | 23 | 21                       | 25 |
| Severe Disability                     | 97                            | 24 | 97                                           | 29 | 9                        | 11 |
| Persistent Vegetative State           | 6                             | 1  | 5                                            | 2  | 0                        | 0  |
| Death                                 | 78                            | 19 | 0                                            | 0  | 0                        | 0  |

|                                                 | Median | Q2 | Q4 | Median | Q2 | Q4 | Median | Q2 | Q4 |
|-------------------------------------------------|--------|----|----|--------|----|----|--------|----|----|
| Days on mechanical ventilation (median +/- IQR) | 9      | 4  | 18 | 9      | 4  | 18 | 5      | 2  | 10 |
| Length of hospital stay (median +/- IQR)        | 10     | 5  | 18 | 9      | 5  | 15 | 8      | 5  | 13 |
| Length of ICU Stay (median +/- IQR)             | 8      | 3  | 18 | 6      | 3  | 18 | 8      | 4  | 13 |

---

Abbreviations: BMI, body mass index; GOS, Glasgow Outcome Scale; LTACH, long-term acute care hospital; SNF, skilled nursing facility.

\*Data are presented as number (%) unless otherwise specified.

---

**Table S2** PCL-5 results stratified by PTSS status. 0: not at all, 1: a little bit, 2: moderately, 3: quite a bit, and 4: extremely

| Question           | PTSS-negative patients<br>(median +/- IQR)                                                                                                              |    |    | PTSS-positive patients (median +/- IQR) |    |    |   |
|--------------------|---------------------------------------------------------------------------------------------------------------------------------------------------------|----|----|-----------------------------------------|----|----|---|
|                    | Median                                                                                                                                                  | Q2 | Q4 | Median                                  | Q2 | Q4 |   |
| Total PCL-5 score  | 3                                                                                                                                                       | 0  | 12 | 58                                      | 39 | 62 |   |
| Intrusion Symptoms | 1.Repeated, disturbing, and unwanted memories of the stressful experience?                                                                              | 0  | 0  | 0                                       | 3  | 2  | 4 |
|                    | 2. Repeated, disturbing dreams of the stressful experience?                                                                                             | 0  | 0  | 0                                       | 3  | 0  | 4 |
|                    | 3. Suddenly feeling or acting as if the stressful experience were actually happening again (as if you were actually back there reliving it)?            | 0  | 0  | 0                                       | 3  | 2  | 4 |
|                    | 4. Feeling very upset when something reminded you of the stressful experience?                                                                          | 0  | 0  | 0                                       | 4  | 3  | 4 |
|                    | 5. Having strong physical reactions when something reminded you of the stressful experience (for example, heart pounding, trouble breathing, sweating)? | 0  | 0  | 0                                       | 3  | 2  | 4 |
| Avoidance          | 6. Avoiding memories, thoughts, or feelings related to the stressful experience?                                                                        | 0  | 0  | 0                                       | 3  | 2  | 4 |
|                    | 7. Avoiding external reminders of the stressful experience (for example, people, places, conversations, activities, objects, or situations)?            | 0  | 0  | 0                                       | 4  | 3  | 4 |

|                                                                      |                                                                                                                                                                                                                                      |                                                                  |   |   |   |   |   |
|----------------------------------------------------------------------|--------------------------------------------------------------------------------------------------------------------------------------------------------------------------------------------------------------------------------------|------------------------------------------------------------------|---|---|---|---|---|
| Negative alteration in cognition and mood                            | 8. Trouble remembering important parts of the stressful experience?                                                                                                                                                                  | 0                                                                | 0 | 0 | 1 | 0 | 3 |
|                                                                      | 9. Having strong negative beliefs about yourself, other people, or the world (for example, having thoughts such as: I am bad, there is something seriously wrong with me, no one can be trusted; the world is completely dangerous)? | 0                                                                | 0 | 0 | 0 | 0 | 3 |
|                                                                      | 10. Blaming yourself or someone else for the stressful experience or what happened after it?                                                                                                                                         | 0                                                                | 0 | 0 | 3 | 0 | 4 |
|                                                                      | 11. Having strong negative feelings such as fear, horror, anger, guilt, or shame?                                                                                                                                                    | 0                                                                | 0 | 0 | 4 | 2 | 4 |
|                                                                      | 12. Loss of interest in activities that you used to enjoy?                                                                                                                                                                           | 0                                                                | 0 | 0 | 4 | 2 | 4 |
|                                                                      | 13. Feeling distant or cut off from other people?                                                                                                                                                                                    | 0                                                                | 0 | 0 | 4 | 1 | 4 |
|                                                                      | 14. Trouble experiencing positive feelings (for example, being unable to feel happiness or have loving feelings for people close to you)?                                                                                            | 0                                                                | 0 | 0 | 3 | 2 | 4 |
|                                                                      | Alteration in arousal and reactivity                                                                                                                                                                                                 | 15. Irritable behavior, angry outbursts, or acting aggressively? | 0 | 0 | 0 | 4 | 1 |
| 16. Taking too many risks or doing things that could cause you harm? |                                                                                                                                                                                                                                      | 0                                                                | 0 | 0 | 0 | 0 | 2 |
| 17. Being "super alert" or watchful or on guard?                     |                                                                                                                                                                                                                                      | 0                                                                | 0 | 1 | 4 | 3 | 4 |
| 18. Feeling jumpy or easily startled?                                |                                                                                                                                                                                                                                      | 0                                                                | 0 | 0 | 3 | 2 | 4 |
| 19. Having difficulty concentrating?                                 |                                                                                                                                                                                                                                      | 0                                                                | 0 | 0 | 4 | 3 | 4 |
| 20. Trouble falling or staying asleep?                               |                                                                                                                                                                                                                                      | 0                                                                | 0 | 1 | 4 | 4 | 4 |
